# Supplementary material for: CUX1 transcription factor is required for optimal ATM/ATR-mediated responses to DNA damage
Source: PubMed Central journal article supplement — Nucleic Acids Res. 2012 Feb 8;40(10):4483–95. doi: 10.1093/nar/gks041 (PMC3378881; doi:10.1093/nar/gks041), 2012-02-08
Supplement: supp_gks041_nar-01673-d-2011-File010.pdf [file supp_gks041_nar-01673-d-2011-File010.pdf]

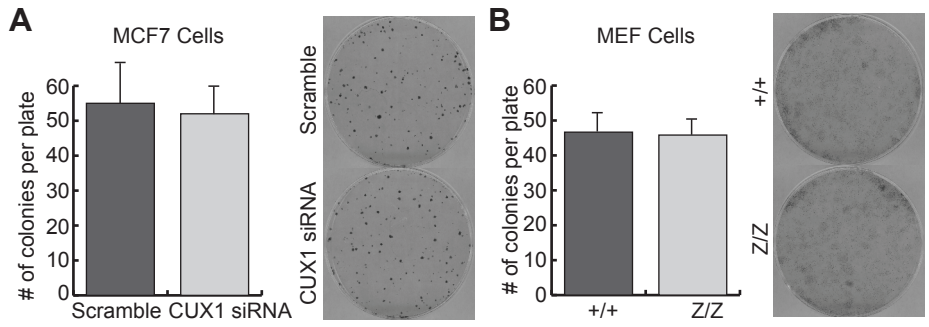

**Supplementary Figure 1 - Clonogenic efficiency of MCF7s and MEFs**

**A** 500 MCF7 cells treated with either a CUX1 specific siRNA or a scrambled control were plated for 10 days prior to fixation and staining.

**B** 5000 MEF cells from Cux1 knockout mice or Cux1 wild-type littermates were plated for 10 days prior to fixation and staining.

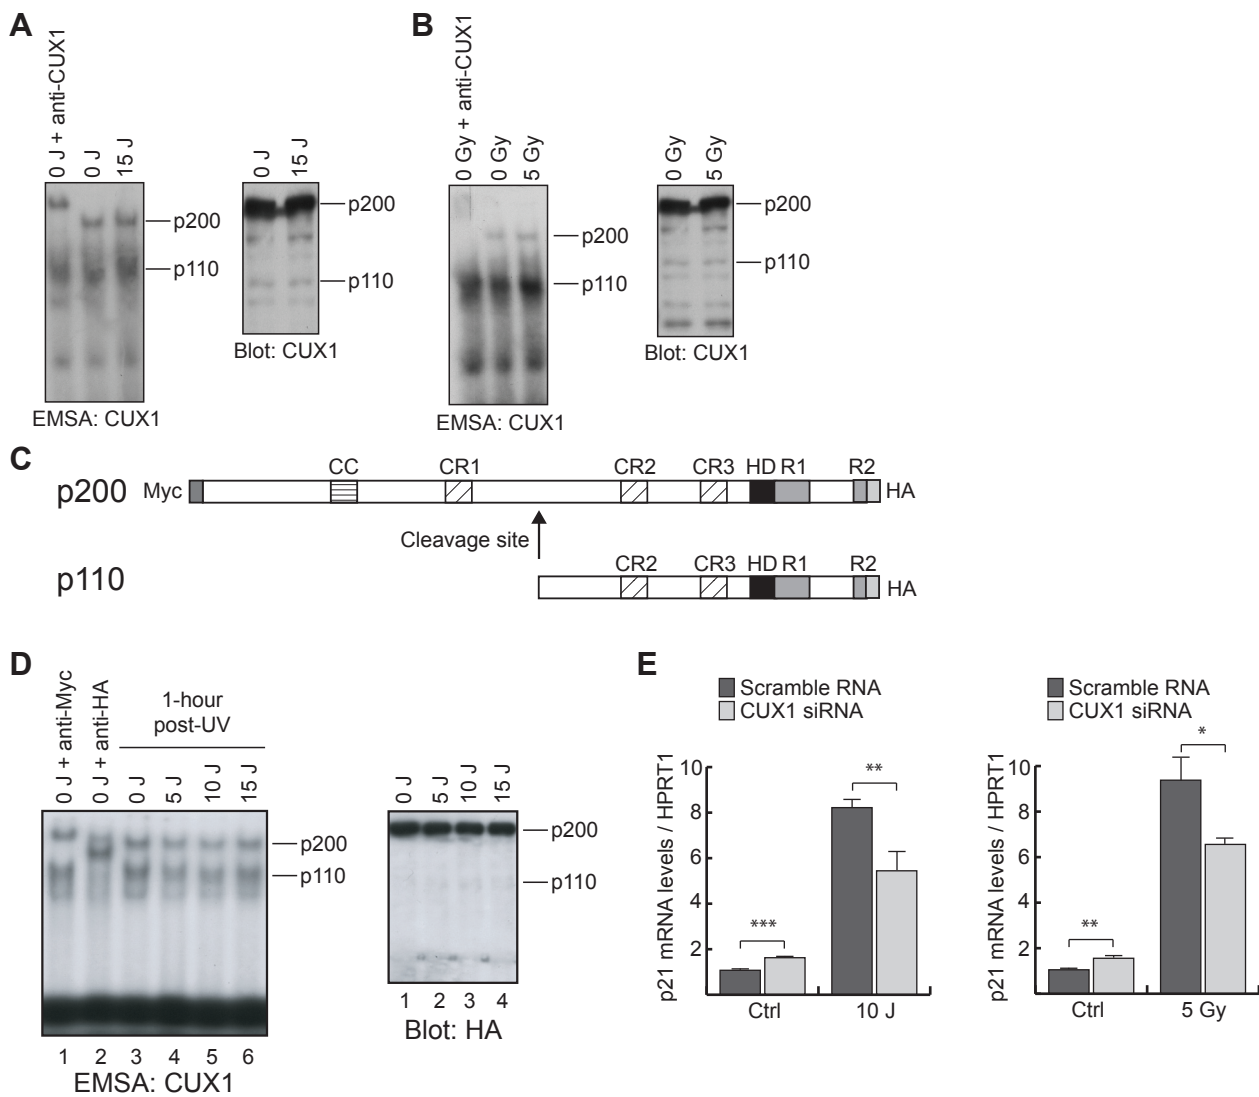

### Supplementary Figure 2 –

CUX1 DNA Binding Activity and Effect of CUX1 Knockdown on p21 mRNA Expression After DNA Damage.

**A** Nuclear protein extracts were prepared from HS578T cells exposed to 15 J UV or left untreated. Left: DNA binding by endogenous CUX1 was assessed by Electrophoretic Mobility Shift Assay (EMSA) using double-stranded oligonucleotides containing a CUX1 consensus binding site. Right: Western blot showing equal levels CUX1 protein.

**B** Nuclear protein extracts were prepared from HS578T cells exposed to 5 Gy IR or left untreated. Left: DNA binding by endogenous CUX1 was assessed by EMSA as in **A**. Right: Western blot showing equal levels CUX1 protein.

**C** Schematic representation of recombinant CUX1 protein is shown. The full length p200 isoform is tagged at both the N-terminus (Myc tag) and C-Terminus (HA tag). p200 is cleaved at the indicated site into the p110 isoform.

**D** Nuclear protein extracts were prepared from NIH 3T3 cells stably expressing the p200 CUX1 recombinant protein described in **C**. Left: DNA binding by recombinant CUX1 was assessed by EMSA as in **A**. Right: Western blot showing equal levels of recombinant CUX1 proteins.

**E** MCF7 cells were transfected with CUX1-specific siRNA or scrambled control. Left: Cells were then exposed to 10 J of UV or left untreated. Right: Cells were exposed to 5 Gy IR or left untreated. p21 mRNA levels were measured by qPCR and normalized to HPRT1. \*: P value <0.05, \*\* < 0.01, \*\*\* <0.001.

Supplementary Table 1 - Primers for qPCR analysis

| <b>Human cDNA</b>    | <b>Forward primer</b>      | <b>Reverse Primer</b>     |
|----------------------|----------------------------|---------------------------|
| ATM                  | CAGCGCAAAGAATCTGGGG        | GCACAAAGTAGGGTGGGAAAGC    |
| ATR                  | TGAAAGGGCATTCCAAAGCG       | CAATAGATAACGGCAGTCTGTAC   |
| BRCA1                | GCAGAGAGTCAGACCCCTTCAATGG  | GCCCAGGTTTCAAGTTTCCTTTTC  |
| CCNG1                | GACAAGCCTGAGAAGGTAACCTGTG  | GTGTGACTCCTCAATAGCATTTTC  |
| CDKN1A               | ATGGTGGCAGTAGAGGCTATGGAC   | TGGAAGGTGTTTGGGGTCAGAC    |
| CHEK1                | CAGGTCTTTCTTATGGGATACCAG   | TGGGGTGCCAAGTAACTGACTATT  |
| CHEK2                | GCTATTGGTTCAGCAAGAGAGGC    | TCAGGCGTTTATCCCCACC       |
| CUX1                 | TGAACGACCCCAACAATGTGG      | GGCTTTTGCTGATACGCTCG      |
| FANCD2               | CGACTGAAACAGGGAGAACACAGC   | GCACACTGGAAACTGGGAATGC    |
| HPRT1                | AACACTTCGTGGGGTCTTTTC      | CTTTGCTTCTTGGTCAGGC       |
| MDM2                 | CCATTGAACCTTGTGTGATTG      | GGCAGGGCTTATTCCTTTTC      |
| NBS1                 | AATGGAACAGTGAGGAATGGAGG    | CAAGATTTGGAAGGTGAGAGTGATG |
| RAD17                | TAGACCCTGACAGCGGAGATGAAG   | CACTGGCACTATTCTGACTCAAAGG |
| RPA1                 | TTTCAGCCAGTAACCAGTCTTTTC   | TCCAATCACATCCACGGAG       |
| RPA2                 | GCCTGTTTTCAITTCCTTCTTTGG   | TTCTTTTCTCTGCCCTGGAG      |
| RPA3                 | AAATCTGCCCATAGACACCCG      | TTTTCCAGCCTCCCTACGAAGC    |
| SMC1L1               | GGAAACCTTAGCAAACCTGCC      | GCCCTGAACCAGACACTATCCAC   |
| TOPBP1               | GTGCTTCATCGTCTACCTTG       | TGCTCCCTCAACAATGCCAG      |
| TP53                 | CTACCTCCGCCATAAAAACTC      | CCCACAACAAAACACCAGTGC     |
| TP53BP1              | TGGCAACCCCGTGAAAATC        | CCACCACATCAAATACCCCTAAAG  |
| GAPDH                | TCCACCACCTGTTGCTGTA        | ACCACAGTCCATGCCATCAC      |
| ACTB                 | GAAGTCCCTTGCCATCCTAAAAG    | ATGCTATCACCTCCCTGTGTG     |
| UBC                  | CAAGACAAGGAAGGCATCCCTC     | ATCCCACCTCTAAGACGGAGCAC   |
| <b>Mouse cDNA</b>    | <b>Forward primer</b>      | <b>Reverse Primer</b>     |
| ATM                  | CAGCAGCACCTCTGATTCTTACAAC  | ACCTTAGCCTTAGGACCTGACTGG  |
| ATR                  | AGGACACTCCAAAGCACCCTG      | GCAGCCCTGTACTCTATTTCCG    |
| BRCA1                | CTGATGACCTGCTGGATGATGTTG   | TGGAGTCGCTCTTCTGACGATT    |
| CCNG1                | AAGTCTTTCTGCCACTCTGACCTG   | CCTTGATTTGAATGCTTCTCTGG   |
| CDKN1A               | CAGTGTGAATACCTGGGTGTC      | CGTGAGACGCTTACAATCTGAGTG  |
| CHEK1                | AACAGGGCTTTCTTGTGGG        | GGCATTGGTAAGATTTGTCCGC    |
| CHEK2                | CAGGAAAAGAAGTCCGGTGACCC    | ATTGGAGCGTGGGAAGGAAGC     |
| CUX1                 | CAGCGCTTATTTGGGGAGACC      | TGGAACCAGTTGATGACGGTG     |
| FANCD2               | GGACCTTGTAGAATTCAGGGAATC   | CAGGATGCTTTGTTGCTATCAGC   |
| HPRT1                | TTGGGCTTCTCACTGCTTTTC      | ATCGCTAATCACGACGCTGG      |
| MDM2                 | TGGAACCCAGGAAGAGTG         | AACCACCAGGAACACGGAG       |
| NBS1                 | CAAGTGAAGGTTGAAAAGCAGGAG   | TTGACCACGACTCTGTCTGAAGTTC |
| RAD17                | GGGACACTTACTTGTTCAGCCTG    | TGTATTCCAATCACCACCGAGG    |
| RPA1                 | GAGTGTGCTTTCCAGTGGTGG      | AACAGACCCCTTGATTCCAGGC    |
| RPA2                 | AACTCTGGTCATCAGGCTTATTGG   | GCAGGCAAGTGCTTACTACTGTG   |
| RPA3                 | CTGGGAAAAGATTCACTCCAC      | ACAGAGCAGGGTTCGCTTG       |
| SMC1L1               | AGTGTGCTTCAGCGGATTGC       | TCTGTTCAAATGCTGCTTGG      |
| TOPBP1               | ATGCTGGAATCCCCTCCTTG       | GTGGTTGTGTATGGCTCACTTCAG  |
| TRP53                | TGAGGTTCTGTTTGTGCCTG       | GGGTGAAATACTCTCCATCAAGTGG |
| TRP53BP1             | GGGTTTTCTCATTTGGTGGTAC     | GTTGGGTGGGTTCAITTTGTGTAC  |
| GAPDH                | TCCACCACCTGTTGCTGTA        | ACCACAGTCCATGCCATCAC      |
| ACTB                 | TATTGGCAACGAGCGTTCC        | GGCATAGAGGTCTTTACGGATGTC  |
| UBC                  | CGCACCTGTGACACTACAACATC    | CCCAAGAACAAGCACAAGGAGG    |
| <b>Human genomic</b> | <b>Forward primer</b>      | <b>Reverse Primer</b>     |
| ATM                  | TGGGCTCTGGAATCATACGGC      | TAACGCTCACGAGTGCTCACCAC   |
| ATR                  | ACTCTGCTGTTCTCAAGCCTGG     | TCGCTGGACTGTCATAGTTCTCAC  |
| BRCA1                | CAGAAAGACCAAGCGTCTC        | CAATAAGCCGCAACTGGAAG      |
| CCNG1                | GATTGGCCGGACTTCTCAC        | GGGACTCGTAGGCAAGAGGA      |
| CDKN1A               | CAGACAACCTCACTCGTCAAATCCTC | AATCTCCCTACACCCTACACTACC  |
| CHEK1                | GCCGCCGACATTGACA           | CATGCCCTCCCTCACTAATC      |
| CHEK2                | CCCTGAGACTGAGGTTCTTGG      | CCACCCTAACTTTCCACGGC      |
| FANCD2               | GTGGAGCAATGGTCGTAGTCTCTC   | ATGAGGAAGCCAAGGTTCCG      |
| MDM2                 | GGTGCTGTCGGGTCA            | ACTGCAGTTTCCGAACGTGT      |
| NBS1                 | ACCTGGTGGTTGGAAAAGGAAC     | CAAACGCACGAAACTACATAACTGG |
| RAD17                | GAGAAACGACCCGAAATGCTC      | TGGTGGATGCCTCACTCCTTAG    |
| RPA1                 | CCATCCTTACTTGACCCTGTCTG    | CATTGGAGAGTTGAAATAGCCTGG  |

|         |                        |                           |
|---------|------------------------|---------------------------|
| RPA2    | CGGCGTGCTCAGGTTT       | TCATAGGCAAGAGGGCGTAG      |
| RPA3    | GGCAAGAGGGAAGGCGAGACA  | GGCGGGAGTCGGCACT          |
| SMC1L1  | CAACAAACTTGCTCCTGCG    | GCATAATCCTGCTGTGACTTCTGTC |
| TOPBP1  | GCAGCAGAAGAGCGGAAATGTC | GCAAAGCCCTAAACCCAAAGG     |
| TP53    | CAGCCCGAACGCAAAG       | CTTGTCATGGCGACTGTCC       |
| TP53BP1 | GCCCGCCACTCAAGAAATCC   | TTCACGCCCTCTCAAGGTCC      |
| GAPDH   | TTTTCCCTTCTTGACTCACCC  | GTGCCTTTCATTCCATCCAGC     |
| ACTB    | AAGGCAACTTTCGGAACGGC   | CCAAAACCTCCCTCCTCCTTTC    |
| UBC     | AAAAGAGGCGGAAACCCAC    | CTCCCTGTTGGCATCAAGTAGG    |
